# Supplementary material
Source: Springer Nature journal article supplement (https://www.springermedizin.de/resource/supplementary/12943_2011_998_MOESM8_ESM.PDF/9552040)
Supplement: MOESM8 [file 9552040]

**Additional file 8:**

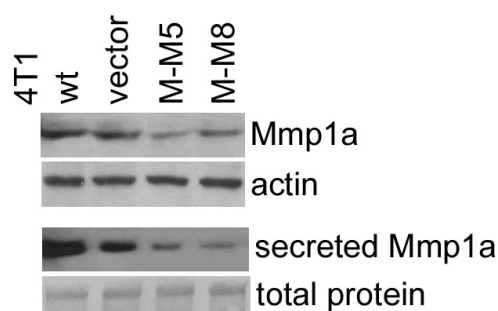

**Figure S8a. c-Myb down-regulates interstitial collagenase Mmp1a in 4T1 cells.** The control (wt, vector) and the MYBup (M-M5, M-M8) cell protein extracts were analyzed by immunoblotting. To control for sample loading, the blots were probed with a  $\beta$ -actin-specific antibody. The secretion of Mmp1a was determined in the cell-conditioned medium. The cells were cultured in a serum-free medium for 8 h, and the medium was harvested and concentrated using the Amicon Ultra centrifugal filter units. Equal amounts of total proteins were loaded.

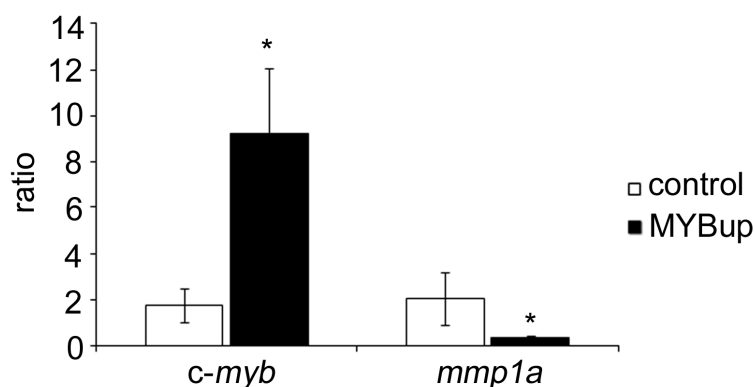

**Figure S8b. Expression of *c-myb* and *mmp1a* mRNAs in 4T1 MYBup and control tumors.** Total RNA was isolated from mouse mammary tumors. The relative amounts of *c-myb* and *mmp1a* mRNAs in the MYBup and control tumors were determined by qRT-PCR. *GAPDH* was used as an internal control. Asterisks indicate significant ( $p < 0.05$ ) differences in the relative amounts of *c-myb* and *mmp1a* mRNAs in the control and MYBup tumors as determined by the *t*-test.
